# 1 Using a Bayesian network to classify time to return to 2 sport based on football injury epidemiological data

3

4 Kate K.Y. YUNG<sup>1,2</sup>, Paul P.Y. Wu<sup>2,3</sup>, Karen aus der Fünten<sup>4</sup>, Anne Hecksteden<sup>5,6</sup>, Tim Meyer<sup>4</sup>

- 5 1. Department of Orthopaedics and Traumatology, Faculty of Medicine, The Chinese  
6 University of Hong Kong, Shatin, Hong Kong  
7 2. School of Mathematical Sciences, Queensland University of Technology, Brisbane,  
8 QLD, Australia  
9 3. ARC Centre of Excellence in Mathematical and Statistical Frontiers (ACEMS),  
10 Melbourne, VIC, Australia  
11 4. Institute for Sports and Preventive Medicine, Saarland University, Saarbrücken,  
12 Germany  
13 5. Institute of Sports Science, Universität Innsbruck, Innsbruck, Austria  
14 6. Institute of Physiology, Medical University Innsbruck, Innsbruck, Austria

15

16

17 ORCID

18 Kate K. Yung 0000-0003-1906-4111

19 Paul P.Y. Wu 0000-0001-5960-8203

20 Karen aus der Fünten 0000-0002-6269-5069

21 Anne Hecksteden 0000-0003-3390-9619

22 Tim Meyer 0000-0003-3425-4546

## 23 **Abstract**

### 24 **Objective**

25 The return-to-sport (RTS) process is multifaceted and complex, as multiple variables may  
26 interact and influence the time to RTS. These variables include intrinsic factors of the player,  
27 such as anthropometrics and playing position, or extrinsic factors, such as competitive pressure.  
28 Providing an individualised estimation is often challenging, and yet clinical decision support  
29 tools are often rare in the industry. This study aims to demonstrate the functions of a Bayesian  
30 network by the use of a set of basic epidemiological data.

31

### 32 **Methods**

33 To exemplify the use of Bayesian network in sports medicine, such as providing an  
34 individualised estimation time to RTS for individual players, we applied Bayesian network to  
35 a set of basic epidemiological data. Bayesian network was used as a decision support tool to  
36 model the epidemiological data and to integrate clinical data, non-clinical factors and expert  
37 knowledge. Specifically, we used the Bayesian network to capture the interaction between  
38 variables in order to 1) classify days to RTS and 2) injury severity (minimal, mild, moderate  
39 and severe).

40

### 41 **Results**

42 Retrospective injury data of 3374 player seasons and 6143 time-loss injuries from seven  
43 seasons of the professional German football league (Bundesliga, 2014/2015 through  
44 2020/2021) were collected from public databases and media resources. A total of twelve  
45 variables from three main categories (player's characteristics and anthropometrics, match  
46 information and injury information) were included. The key response variables are 1) **days to**  
47 **RTS** (1-3, 4-7, 8-14, 15-28, 29-60, >60 , and 2) **severity** (minimal, mild, moderate and severe).  
48 As there are more than two categories, producer's and user's accuracy was used to reflect the  
49 sensitivity and specificity of the model. The producer's accuracy of the model for days to RTS  
50 ranges from 0.24 to 0.97, while for severity categories range from 0.73 to 1.00. The user's  
51 accuracy of the model for days to RTS ranges from 0.52 to 0.83, while for severity categories,  
52 it ranges from 0.67 to 1.00.

53

## 54 **Conclusions**

55 The Bayesian network can help to capture different types of data to model the probability of  
56 an outcome, such as days to return to sports. In our study, the result from the BN may support  
57 coaches and players in predicting days to RTS given an injury, 2) support team planning via  
58 assessment of scenarios based on player's characteristics and injury risk and 3) provide  
59 evidence-based support of understanding relationships between factors and RTS. This study  
60 shows the key functions and applications of the Bayesian network in RTS, and we suggest  
61 further experimenting and developing the Bayesian network into a decision-supporting aid.

62

## 63 **1. Background**

### 64 **1.1. Challenges in return to sport decision making**

65 Return to sport (RTS) is when an injured athlete can return to full unrestricted team training  
66 without modifications in duration and/ or activities(1-3). Forecasting or estimating the return  
67 date of an injured athlete is crucial for team planning, performance optimisation, and game  
68 strategy development. By having an estimated return date, medical staff can create an  
69 individualised rehabilitation plan to gradually improve the athlete's condition and mitigate re-  
70 injury risk. The predicted timeframe also helps coaching staff to adjust their game plans and  
71 strategies, maximising the team's chances of success.

72 There is a growing acknowledgement that athletes operate within a complex system  
73 and are subject to the influences of a multitude of variables(4, 5). These factors include  
74 previous injury history, current injury, body mass index, playing positions, sociological factors,  
75 psychological status, and the nature of the sports event(4). Accurately predicting an athlete's  
76 RTS can be a challenging task for medical staff due to the intricate interactions between various  
77 variables and their influence on injuries. The human body's complexity and the system's highly  
78 intricate nature further complicate the task. Understanding these interactions and their impact  
79 on injuries becomes crucial for providing accurate prognoses and projecting a range of the  
80 likely RTS time (e.g., there is a 75% chance for the player to return between 4-5 weeks). This  
81 could help medical staff and athletes to prepare for both ends of the scenario.

82 Large-scale epidemiological studies have made promising strides in providing valuable  
83 insights into the expected time to RTS for major injuries in football at the population level(6-  
84 9). These studies describe the risk factors for a disease or injury and the extent of the  
85 problem(10). Medical staff can use them as a starting point for estimating the time to RTS(11).  
86 This approach aligns with the “anchor and adjust” strategy(12), which can be used to optimise  
87 predictive accuracy, especially when making decisions in uncertain scenarios (e.g., injury).  
88 However, typical epidemiological studies are intended to offer correlations and data based on  
89 groups to reflect population-level insights and trends. While this data is valuable for  
90 highlighting general patterns and insights, a tool to translate population-level data into  
91 individual-level assessments and allow for personalised estimations would be helpful.

92 Due to the complex systems, forecasting the time to RTS based on individual  
93 characteristics can be challenging. There are several reasons why this process is not

94 straightforward. First, personal characteristics and other factors, such as age and playing  
95 position, are recommended to be considered in the Strategic Assessment of Risk and Risk  
96 Tolerance framework(13). However, quantifying and synthesising these information in the  
97 clinical reasoning process can be difficult. For example, what is the difference between the  
98 rehabilitation time required for a 20-year-old striker versus a 30-year-old defender with a same  
99 type of hamstring strain injury? Second, synthesising useful information from broad  
100 population-level epidemiological data covering entire leagues and multiple seasons and then  
101 personalising it to a specific player-context is almost cognitively infeasible for a single  
102 individual or even a small group of individuals. There is a lack of tool to help translate the  
103 sheer volume and complexity of the population-level data and tailor them on an individual  
104 level. Third, medical staff, like any other humans, are susceptible to various decision-making  
105 challenges. They have limited information processing capacity (14) and face potential  
106 cognitive biases(15, 16). Human judgment can be vulnerable, particularly when it comes to  
107 statistical and probabilistic reasoning(17). Without an objective and reliable decision tool  
108 specifically designed to provide individualised RTS estimations, medical staff often rely  
109 heavily on their clinical experience and population-level epidemiological data.

110 Data scientists have the potential to develop decision support tools that can effectively  
111 synthesise broad epidemiological data and personalise it to specific player-contexts,  
112 overcoming the cognitive limitations faced by individuals. These tools can provide valuable  
113 additional information that would otherwise be challenging for a single human to process. In  
114 practical setting, data scientists can take charge of setting up and maintaining the decision  
115 support tool, while users such as medical staff and coaches utilise the tool in planning for an  
116 athlete's RTS, making necessary adjustments for the team, and ensuring the team remains  
117 competitive. This collaboration between data scientists and end users can lead to more  
118 informed decision-making and strategic planning.

119 Developing a computer-based decision support tool that uses a complex systems  
120 approach may be helpful to overcome the previous challenges and offer a competitive  
121 advantage in forecasting RTS(18). Specifically, the key differentiator of a complex systems  
122 approach in RTS is the explicit modelling of factor interactions that could be queried and used  
123 by medical staff in multiple ways. This includes but is not limited to understanding the strength  
124 of influence of different variables and predicting the outcome based on custom RTS scenarios.

125 Computer-based decision support tools can be divided into predictive and descriptive  
126 modelling(19). Predictive modelling can be used for injury diagnosis, severity estimation, and  
127 rehabilitation planning. In particular, the Bayesian network (BN) is well suited for providing  
128 injury prognosis in sports, due to its capacity to model complex systems and to integrate clinical  
129 data, non-clinical factors and expert knowledge. However, it has not been used for such  
130 purpose.

## 131 **1.2. About the Bayesian network**

132 A BN is a graph-based modelling method where the relationships between variables  
133 (nodes) are represented with arrows (arcs). The presence of an arc denotes the influence of one  
134 node on another, and the absence of one assumes conditional independence(20). In Figure 1,  
135 we illustrated how the parent nodes and a child node can be related using graph-based  
136 modelling. While real data often contains a mixture of discrete and continuous variables, BN  
137 structure learning algorithms often assume the random variables are discrete. This type of BN  
138 is called the discrete BN, which involves discretising continuous variables in the dataset into  
139 categories. Although some information is lost when continuous data are categorised(21), there  
140 are merits of using the discrete Bayesian network that worth discussing.

141 In practical settings, people often find it easier to work with discrete representations  
142 rather than continuous data. Discrete variables tend to be more interpretable, facilitating  
143 abstract reasoning(22). For example, word tokens often enable fast and exact processing(22).  
144 Consider the comparison between the words "tall" and "short" versus the numerical values  
145 "183cm" and "150cm". Some may find the discrete terms are easier to grasp and apply in  
146 reasoning. Given the complexity of the human body and interacting processes involved in RTS,  
147 discretisation may help capture the resolution of data available and relevant to the decision  
148 support scenario at hand(23).

149 However, it's important to note the disadvantages to discretising continuous  
150 variables(24). Discretisation can lead to information loss, as the finer details and nuances  
151 captured by continuous data may be overlooked. By converting continuous variables into  
152 discrete categories, we sacrifice the precision and granularity inherent in the original data.  
153 Additionally, the choice of how to discretise the variables can introduce subjectivity and bias  
154 into the analysis and therefore, it is crucial to ensure transparency in how variables are  
155 discretised to mitigate these potential issues.

156 BNs provide a platform for inferring state probabilities given observations, referred to as  
157 evidence, of one or more nodes in the network. In the discrete BN, the relationship between  
158 parent nodes and a child node can be quantified using conditional probability tables (CPTs).  
159 The CPT reflects the probability of child node states (or outcomes) given every possible  
160 combination of parent node states(25). As new evidence comes in, changes may be brought to  
161 the node's marginal probability(26), which is known as the posterior probability. The posterior  
162 probability is the updated probability of a hypothesis or event after considering new evidence.  
163 They combine prior beliefs with the likelihood of the data to provide an updated estimate of  
164 the event's probability.

165 BNs can perform both predictive and diagnostic inference. For example, medical staff  
166 can use the former to predict the outcome of an injury for a given clinical diagnosis,  
167 anthropometric and match factors (predictive inference); but can also enter the injury severity  
168 as an observation to examine what injury factors could explain that observation (diagnostic  
169 inference). As an important feature to end users who may not be familiar with statistics, the  
170 BN provide visuals to facilitate understanding and supporting decision making across teams of  
171 users, such as, among athletes, coaching staff, medical and non-medical personnel.

172 Figure 1 A graph-based modelling showing nodes (A to F) and arcs (arrows). A is the  
173 parent of B, while B is the child of A; B is the parent of C and D, while C and D are the children  
174 of B; and so on. A is the ancestor of B, C, D, E and F, while B, C, D, E and F are the descendants  
175 of A; and so on. The arrows indicate the direction of influence.

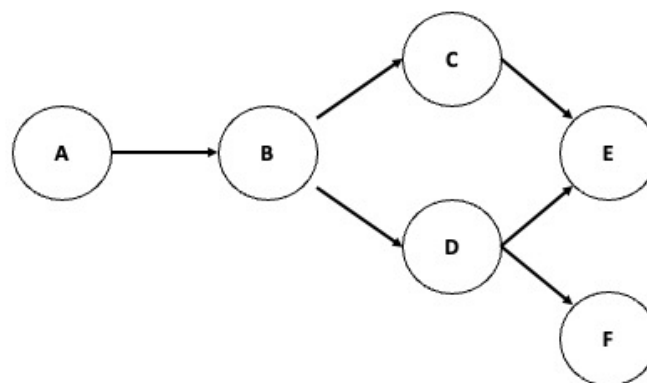

177 Another key feature of a BN is that medical staff can integrate and visualise data from  
178 multiple sources into a single BN, such as clinical data, empirical evidence and expert  
179 knowledge(27), or a combination of both them(28). Expert knowledge can be invaluable when  
180 empirical data is scarce or unavailable. It also plays a significant role in developing models,  
181 selecting data or variables, estimating parameters, interpreting results and determining the  
182 uncertainty characteristics. Since the BN can be customised based on the experts'  
183 knowledge(29, 30), it may be appealing for small sample size research in elite sports  
184 research(31-33), where some data may be missing or not be feasible to collect (e.g., limitations  
185 in applied settings)(27). BNs have been used to support clinical decisions(34-37), analyse  
186 complex systems in ecology (23, 38, 39) and logistics(40).

### 187 **1.3. Study objectives**

188 The objective of this study was to demonstrate the use of a Bayesian network and its  
189 potential use in becoming a decision support tool for medical staff for RTS. Specifically, a  
190 discrete BN was modelled based on a set of basic epidemiological data to demonstrate how  
191 medical staff can use BN to understand (i) the most influential variable to the outcomes (section  
192 3.3), (ii) the strength of influence of different variables (section 3.3), and to (iii) demonstrate  
193 its use with a case scenarios (section 4.2). The paper is structured as follows: Section 2  
194 describes the methodology, including study design and steps to construct a BN; Section 3  
195 describes the results; Section 4 discusses the results and application of the BN in a clinical  
196 setting; Section 5 provides an overall conclusion of the study.



## 197 **2. Method**

### 198 **2.1. Study design**

199 The study is a retrospective analysis of prospectively collected injury data from the German  
200 professional men's highest football league (Bundesliga) between 2014/2015 - 2020/2021.  
201 Neither research ethics board approval nor a trial registration was required as all data were  
202 collected from publicly available sources(9, 41). We reported the result with reference to the  
203 Transparent Reporting of a multivariable prediction model for Individual Prognosis Or  
204 Diagnosis (TRIPOD) statement(42).

### 205 **2.2. Participants**

206 Players who played in the Bundesliga in the above-mentioned seven seasons were included in  
207 the study. Injured players who did not return to the Bundesliga in the same season and those  
208 without complete data were excluded from the analysis. All participants were identified using  
209 a publicly available database, including Kicker Sportmagazin™, and clubs' official websites.  
210 Data collection was performed via methods established in previous investigations(9, 43). The  
211 data has been collected according to the Fuller et al. consensus statement for football injury  
212 research and the same definitions have been the same throughout the 7 seasons(44). 3374 player  
213 Bundesliga seasons were registered over the seven seasons from 2014/2015-2020/2021. A total  
214 of 6653 time-loss injuries were recorded. After removing injuries without complete data, 6143  
215 time-loss injuries remained.

### 216 **2.3. Construction of the Bayesian network**

217 The modelling process and validation were performed in GeNIe 2.0 (Bayes Fusion, LLC)(45).  
218 There are four main steps to creating and validating a BN:

- 219 1) Identify the variables (nodes) of the BN and the key response variables. In this  
220 study, the key response variables are the (i) severity of the injury (*severity*) and  
221 (ii) days to RTS (*days\_rts*). They are used to evaluate the performance of the  
222 BN. The nodes and sources of information are outlined in Table 1.
- 223 2) Learn the graphical structure of the BN and display the relationships between  
224 all the nodes.

- 225                   3) Learn the probability distribution governing the relationships between the nodes.  
226                   4) Validate the BN to evaluate how well the BN can classify injury based on the  
227                   key response variables: (i) *severity* and (ii) *days\_rts*.

### 228 ***2.3.1. Step 1: Identify the main variables***

229 This model is intended to capture the conditional probabilistic relationships among personal  
230 characteristics, match and injury information. The variables in this study are commonly  
231 included in epidemiologic studies (46) and we have summarised them in Table 1.

232 All time-loss injuries that occurred during football competitions and training sessions  
233 were included, and the day of the injury is counted as day zero. A time-loss injury is when a  
234 player cannot fully participate in training or competition due to injury(44). RTS is defined as  
235 when the player has received medical clearance to allow full participation in training and is  
236 available for match selection(2). Details of the injury (type of injury, body region, contact/non-  
237 contact injury, training or match) were labelled based on the Fuller et al. consensus of data  
238 collection in football(44). The time of the season was based on an injury epidemiologic study  
239 in European football(47). Personal characteristics and anthropometrics, match information and  
240 the above information are used as the explanatory variables for constructing the model.

241 We are interested in determining the days to RTS, therefore, the two key response  
242 variables in this model are injury severity (*severity*) and days to RTS (*days\_rts*). Injury severity  
243 (*severity*) was categorised according to the days of absence in match or training as outlined by  
244 the Fuller et al. consensus statement on football injury studies(44): minimal (1–3 days), mild  
245 (4–7 days), moderate (8–28 days), or severe (>28 days). We further create a new variable based  
246 on days to RTS (*days\_rts*) to evaluate if the model could classify the days to RTS into more  
247 precise categories. There are two additional categories in *days\_rts* as compared to *severity*: 1-  
248 3, 4-7, 8-14, **15-28**, 29-60, **>60** days. In context, these variables form the nodes in the BN. In  
249 particular, *days\_rts* directly maps to *severity*, except that severity has fewer states, combining  
250 the last two in *days\_rts* into one (i.e., any injuries taking more than 28 for RTS is classified as  
251 severe). A summary of the variables and source of the data are presented in Table 1.

252 Table 1 Summary of data type and source of information.

| Category | Variable ( <i>node name in the BN</i> ) | Source |
|----------|-----------------------------------------|--------|
|----------|-----------------------------------------|--------|

|                                              |                                                                                                                                                                                                                                                                               |                                                                                                                          |
|----------------------------------------------|-------------------------------------------------------------------------------------------------------------------------------------------------------------------------------------------------------------------------------------------------------------------------------|--------------------------------------------------------------------------------------------------------------------------|
| Personal characteristics and anthropometrics | <ul style="list-style-type: none"> <li>• Age (<i>age</i>)</li> <li>• Height (<i>height</i>)</li> <li>• Weight (<i>weight</i>)</li> <li>• Main playing position (<i>main_position</i>)</li> </ul>                                                                              | Kicker<br>Sportmagazin™ and clubs' official website                                                                      |
| Match information                            | <ul style="list-style-type: none"> <li>• Time of the season (<i>time_season</i>)</li> <li>• Training or match (<i>training_game</i>)</li> </ul>                                                                                                                               | Ligainsider, official team websites, injury reports, official team press releases and professional statistical websites. |
| Injury information                           | <ul style="list-style-type: none"> <li>• Type of injury (<i>type_injury</i>)</li> <li>• Body region (<i>body_region</i>)</li> <li>• Contact/non-contact (<i>contact_noncontact</i>)</li> <li>• Severity (<i>severity</i>)</li> <li>• Days to RTS (<i>days_rts</i>)</li> </ul> |                                                                                                                          |

253

### 254 **2.3.2. Step 2: Define the graphical structure**

255 We incorporated expert knowledge to constrain the search to help ensure graph structures  
 256 produced are consistent with clinical science (See Supplementary Information Figure 1). We  
 257 first specified the temporal order of the variables, ensuring there were no arcs from variables  
 258 that occurred later (e.g., injury) to nodes happening earlier (e.g., main playing position).  
 259 Following this, KY helped establish the relationships (arcs) within the graphical structure.  
 260 Notably, our key response variable, *days\_rts*, was directly linked to severity in the graphical  
 261 structure. This mapping was based on the definition of severity outlined in the Fuller et al.  
 262 consensus statement on football injury studies, which defines severity by the duration of  
 263 unavailability for full training(44). This mapping was done manually based on clinical  
 264 knowledge and could not be learnt from algorithms. Finally, with the constraints in place, we  
 265 use the Bayesian Search algorithm in GeNIe 2.0 to find the best-fitted network for the optimal  
 266 network configuration that aligns with the collected data and expert knowledge(20, 48).

### 267 **2.3.3. Step 3: Define the probability distribution**

268 There are multiple ways to discretise continuous data, including manual, unsupervised  
 269 and supervised. Each method offers distinct advantages, such as improved model performance,  
 270 easier interpretation, and computational efficiency(49). Manual discretisation involves  
 271 manually defining thresholds or categories to discretise the continuous data. This approach  
 272 provides flexibility and allows domain experts to incorporate their knowledge, ensuring that

273 the categories align with relevant domain-specific consensus statements and the specific needs  
274 of the analysis. Unsupervised discretisation involves using clustering algorithms to identify  
275 natural groupings or patterns in the data. These clusters can then be treated as discrete  
276 categories. This is particularly useful when prior knowledge or predefined categories are  
277 unavailable(50). Supervised discretisation utilises labelled data to guide the discretisation  
278 process. Machine learning algorithms or decision trees can be employed to learn optimal  
279 thresholds or categories that maximise predictive performance. This method can enhance both  
280 model performance and interpretability(50).

281 We manually discretised the continuous data based on domain-specific decision  
282 categories to maximise usability across various practitioner types and clubs. Specifically, the  
283 continuous data are discretised based on categories that are easy to apply practically or with  
284 reference to relevant consensus statements. We discretised *age*, *height*, and *weight* into three  
285 categories that were representative of the typical values observed in the sample, to create  
286 uniform count categories that were both meaningful and easy to interpret. *severity* was  
287 discretised based on the Fuller et al. consensus of epidemiological data collection into four  
288 categories (minimal, mild, moderate and severe)(44). *days\_rts* was discretised into six  
289 categories: 1-3, 4-7, 8-14, 15-28, 29-60, >60 days, with reference to the Fuller et al. consensus  
290 of epidemiological data collection(44). Descriptions of the nodes and categories are  
291 summarised in Table 2. We used the Expectation Maximisation (EM) algorithm in GeNIe 2.0  
292 to determine the probability distribution (parameter learning) of the dataset(51, 52).

293

294 Table 2 Description of data set variables.

|   | <b>Node name</b>     | <b>Description</b>                     | <b>Categories (States)</b>                  |
|---|----------------------|----------------------------------------|---------------------------------------------|
| 1 | <i>age</i>           | Age at the start of the season.        | <24, 24-27, >27                             |
| 2 | <i>height</i>        | Height at the start of the season (cm) | <180,180-186, >186                          |
| 3 | <i>weight</i>        | Weight at the start of the season (kg) | <75, 75-81, >81                             |
| 4 | <i>bmi</i>           | Body mass index (BMI)                  | <22.8, 22.8-23.8, >23.8                     |
| 5 | <i>main_position</i> | Playing location in the field          | Goalkeeper, defender, midfield and attacker |

|    |                            |                                                                      |                                                                                                                                                                                                                                             |
|----|----------------------------|----------------------------------------------------------------------|---------------------------------------------------------------------------------------------------------------------------------------------------------------------------------------------------------------------------------------------|
| 6  | <i>body_part</i>           | The body part which was injured                                      | Head/face, neck/cervical spine, shoulder/clavicular, upper arm, elbow, forearm, wrist, hand/finger/thumb, sternum/ribs/upper back, abdomen, lower back/ pelvis/ sacrum, hip /groin, thigh, knee, lower leg/Achilles tendon, ankle, foot/toe |
| 7  | <i>type_injury</i>         | The type of injury that occurred                                     | Fractures and bone stress, joint and ligament, muscles and tendon, haematoma/contusions/bruise, laceration and skin lesion, central/peripheral nervous systems, other injuries <sup>1</sup>                                                 |
| 8  | <i>contact_non contact</i> | Whether the injury occurred was contact or non-contact               | Contact, non-contact                                                                                                                                                                                                                        |
| 9  | <i>training_match</i>      | Whether the injury occurred during a competition or training session | match, training                                                                                                                                                                                                                             |
| 10 | <i>time_season</i>         | Part of the season in which the injury occurred                      | Preseason (Jul-Aug), fall (Sep-Nov), Winter (Dec-Feb), spring (Mar-May)                                                                                                                                                                     |
| 11 | <i>days_RTS</i>            | Days to return to competition or training session (days)             | 1-3, 4-7, 8-14, 15-28, 29-60, >60                                                                                                                                                                                                           |
| 12 | <i>severity</i>            | The severity of the injury                                           | Minimal (1-3 days), mild (4-7 days), moderate (8-28 days), severe (>28 days)                                                                                                                                                                |

<sup>1</sup> Injuries grouped as ‘other’ include bursitis, peritonitis, capsular tears, chondral lesion, with no individual category accounting to more than 1% of the injuries.

#### 296 **2.3.4. Step 4: Validation of the BN**

297 A crucial element of learning is to validate the model. Validation was performed on the two  
298 target nodes, i.e., *severity* and *days\_rts*, which are the main outcomes of interest. Ten-fold  
299 cross-validation was performed where the dataset was split into ten parts of equal  
300 probability(53). The model was trained on nine parts and tested on the remaining tenth part of  
301 the unseen data (holdout test sets). The process was repeated ten times, with a different part of  
302 the data being used for testing. The model evaluation technique implemented in GeNIe keeps  
303 the model structure fixed and re-learns the model parameters during each of the folds. We  
304 compiled the results of the test splits to report the producer's and user's accuracy(54). The  
305 producer's accuracy is calculated by dividing the total number of correctly classified injury  
306 severity by the total number of actual occurrences of injury of that severity. Producer's accuracy  
307 is analogous to sensitivity in binary classification, as it represents the true positive rate for each  
308 category.

$$309 \quad \text{Producer's accuracy} = \frac{\text{True positive}}{\text{True positive} + \text{False negative}}$$

310 The user's accuracy is calculated by dividing the total number of correctly classified  
311 injury severity by the total classified true occurrences of injury of that severity. Similar to  
312 specificity, it represents the correctness of the model's predictions within each category. User's  
313 accuracy provides insights into the precision of the model's predictions for each category.

$$314 \quad \text{User's accuracy} = \frac{\text{True positive}}{\text{True positive} + \text{False positive}}$$

315 By considering both the producer's and user's accuracy, we can evaluate the model's  
316 performance in terms of both sensitivity (ability to classify correctly) and specificity (accuracy  
317 of predictions within each category). This is particularly relevant when dealing with models  
318 that have multiple categories, such as our current model's injury severity classification.

## 319 **3. Results**

### 320 **3.1. Demographics**

321 The demographics and the main playing positions of injured players are shown in  
322 Supplementary Table 1. The breakdown of injury by nature of injury (contact or non-contact),  
323 event (match or training), body region, and types of injuries are available in Supplementary  
324 Table 2.

325

### 326 **3.2. Bayesian network**

327 The network and the probability distribution of each variable are presented in Figure 2. The  
328 model's producer's accuracy in classifying *days\_rts* and *severity* is presented in Table 3. In  
329 terms of categorising *days\_rts*, the producer's accuracy ranges from 0.24 to 0.97, with the best  
330 performance for shorter days (i.e., below 3 days) and the worst performance for the mid-range  
331 category (i.e., 8-14 days). In classifying the injury's severity, the producer's accuracy ranges  
332 from 0.73 to 1.00, with the best performance for severe and the worst for minimal. In terms of  
333 categorising *days\_rts*, the user's accuracy ranges from 0.52 to 0.83, with the best performance  
334 for days 3-7 and the worst performance for the mid-range category (i.e., 8-14 and 15-28 days).  
335 In classifying the injury's severity, the producer's accuracy ranges from 0.67 to 1.00, with  
336 >0.90 in all categories except minimal.

337 In our model, the type of injury and the injured body region are directly connected to  
338 *days\_rts* (Figure 2). The percentages indicate the distribution of values under each variable,  
339 while the blue arrows indicate how factors influence one another (Figure 2). Based on the  
340 sensitivity analysis, the type of injury and the injured body region are most influential to the  
341 *days\_rts*, followed by age, contact or non-contact injury and the nature of the event (training  
342 or match) (see Figure 2). Time of the season, weight, and height only had a minor influence on  
343 the result. The time of the season is also associated with the nature of the event (training or  
344 match) and the *type of injury*, which is supported by empirical evidence(55).

345

346 Figure 2 Structure and network probability of the Bayesian network. The percentages indicate  
 347 the distribution of values under each variable, while the blue arrows indicate how factors  
 348 influence one another.

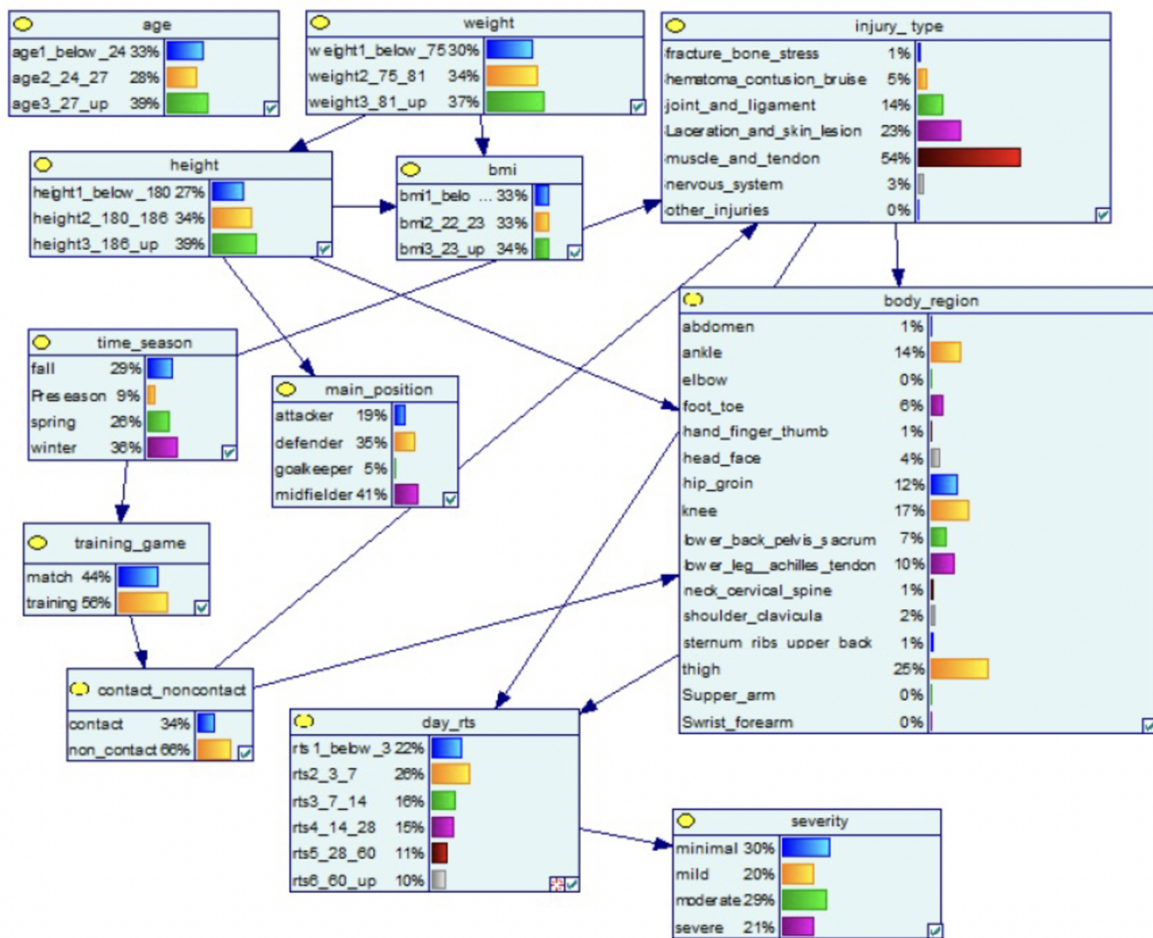

349

350

351 Table 3 The model's producer's and user's accuracy of classifying days to RTS and severity  
 352 of the injuries.

| Days to RTS categories | Number of occurrences | Producer's accuracy | User's accuracy |
|------------------------|-----------------------|---------------------|-----------------|
| Below 3                | 1403                  | 0.97                | 0.73            |
| Days 3-7               | 1576                  | 0.67                | 0.83            |
| Days 8-14              | 1042                  | 0.24                | 0.52            |
| Days 15-28             | 888                   | 0.76                | 0.52            |
| Days 29-60             | 686                   | 0.59                | 0.66            |
| 60 and above           | 548                   | 0.61                | 0.57            |
| Overall                | 6143                  | 0.66                | 0.66            |



| Severity categories | Number of Occurrences | Producer's accuracy | Users' accuracy |
|---------------------|-----------------------|---------------------|-----------------|
| Minimal             | 1235                  | 0.73                | 1.00            |
| Mild                | 1930                  | 0.85                | 0.67            |
| Moderate            | 1773                  | 0.98                | 0.90            |
| Severe              | 1205                  | 1.00                | 0.98            |
| Overall             | 6143                  | 0.88                | 0.88            |

353

### 354 **3.3. Sensitivity analysis, feature selection and strength of influence**

355 A sensitivity analysis was performed using built-in functionality in GeNIe to determine the  
356 influence of the individual nodes. Sensitivity analysis helps determine the influence of  
357 observing the states of specific nodes (i.e., prior and conditional probabilities) on the output  
358 variables (i.e., posterior probabilities)(56), which in this case, are the days to RTS and severity  
359 of the injury (Figure 3). This can help to support the selection of key variables to be included  
360 in a model (feature selection). Results of the sensitivity analysis are visually summarised in the  
361 form of tornado charts in Supplementary Information 2.

362

363 Figure 3 Feature selection of the Bayesian network

364 Red-coloured nodes: contain variables important for calculating posterior probability  
365 distributions in *days\_rts*. Key: A darker red colour indicates a higher degree of influence. Grey-  
366 coloured nodes: the node has no influence on the posterior probability distributions of *days\_rts*.

367

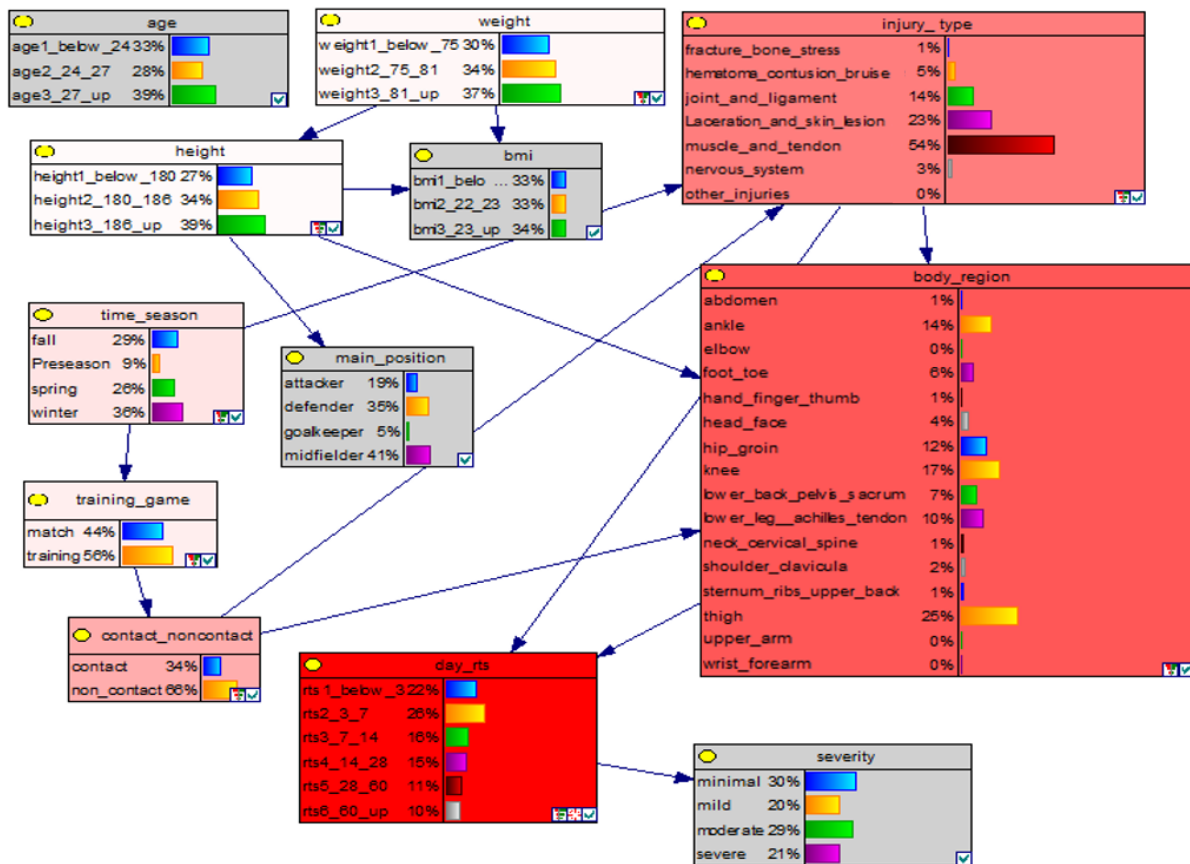

368

369

370

371

372

373

374

375

376

377

378

Highly sensitive variables affect the inference results more significantly. Identifying the highly sensitive variables directs medical staff to specific areas to focus on to affect the BN's outcome. As an example, in Figure 3, we have set *days\_rts* as the key response variable. Nodes coloured in red contain variables important for calculating posterior probability distributions in *days\_rts*. Grey-coloured nodes have no influence on the posterior probability distributions of *days\_rts*, as determined by data and knowledge. Based on the sensitivity analysis, *body\_region*, *injury\_type* and *contact\_noncontact* are the most influential to the outcome in *days\_rts* (Figure 3). A numeric form of the strength of influence of different variables can be found in Supplementary Information Table 3.

## 379 **4. Discussion**

380 This study demonstrates the applicability of a BN in an epidemiological dataset to project  
381 rehabilitation timelines and provides evidence-based support to RTS decisions. We integrated  
382 personal characteristics and anthropometrics, match information and injury information to  
383 construct a BN that may inform the days to RTS and injury severity.

### 384 **4.1. The BN in the context of RTS**

385 In this model, we use a hybrid approach in constructing the BN; that is, we have  
386 combined clinical knowledge and data-driven learning (Bayesian Search algorithm) when  
387 constructing the graphical structure. This is because constructing the BN using pure algorithmic  
388 approaches (i.e., unsupervised learning) can sometimes produce graph structures with  
389 unreasonable arcs, such as the model attempting to explain age with severity. However, if we  
390 use a pure domain approach, we may miss some of the patterns and linkages between variables  
391 that were not observed by clinicians' eyes. Therefore, we opted to use a hybrid approach when  
392 constructing the BN.

393 The BN model may help medical staff working in the Bundesliga to view athletes and  
394 injuries with a complex systems approach. For example, the model captured the complex  
395 relationships between the time of the season, the injury type and injury occurrence (Figure 2).  
396 Specifically, in our BN model, the time of the season correlates with the weather, which is then  
397 associated with the ground condition (55) and injury occurrence(57, 58). As a key feature of a  
398 complex systems approach, the BN can explicitly model the factor interactions/relationships  
399 and query in multiple ways, such as comparing the outcomes of custom RTS scenarios (section  
400 4.2), understanding the most influential factors (section 3.3) and the strength of influence  
401 (section 3.3).

402 To our knowledge, no study in the Bundesliga has studied the correlations of the above  
403 factors, so we use an example from the English Premier League (EPL) to illustrate the possible  
404 correlations. In the EPL, the ground condition tends to be drier in the preseason. Warm, dry  
405 and hard surfaces may be associated with higher injury occurrence(57, 58), possibly due to a  
406 higher level of shoe-surface traction influence (59) and faster running speed(60). On the  
407 contrary, wet and muddy ground is associated with lower injury occurrence(58), possibly due  
408 to changes in playing style (e.g., more tackles) and reduced shoe-surface traction. While the

409 time of the season affects the injury occurrence, there has been no direct effect on days to RTS.  
410 Analysing these complex relationships would be difficult without the use of computers and  
411 advanced statistical modelling.

412 The model is more accurate for classifying injuries into 4 categories under *severity*  
413 (sensitivity = 0.75 – 1.00), compared to 6 categories *days\_rts* (sensitivity = 0.24 – 0.97). This  
414 is not surprising because the increase in the number of categories challenged the model to  
415 provide a higher accuracy. The model is most accurate in classifying injuries with shorter  
416 *days\_rts* (days below 3, sensitivity = 0.97) and least accurate in classifying mid-range injuries  
417 (days 8-14, sensitivity = 0.24). A possible explanation is that injuries with minimal days of  
418 absence have particular injury patterns, for example, they may be upper body injuries and  
419 hematoma/contusion/bruise injuries. The model is least accurate for classifying mid-range  
420 injuries (8-14 days), possibly because the model lacks information that may differentiate the  
421 prognoses. This information may be the extent of tissue damage (e.g., the sub-classification of  
422 muscle injury) and the specific location of the injury (e.g., involvement of central tendon  
423 injury).

## 424 **4.2. Illustrative application of the BN**

425 Here, we use a hypothetical case study to demonstrate the practicability of using the  
426 BN in classifying the days to RTS and the injury severity of a player. We input the player's  
427 characteristics and anthropometrics, match information and injury information into the BN  
428 constructed earlier. The probability distribution is shown in Figure 4

429 *A player (age: 25, weight: 77kg, height: 185cm, attacker) playing in the German professional*  
430 *football league sprained his ankle ligament in a non-contact injury and pulled out of the*  
431 *preseason training session. The coach would like to know when the player is available for*  
432 *selection.*

433 Figure 4 Bayesian network of the case study.

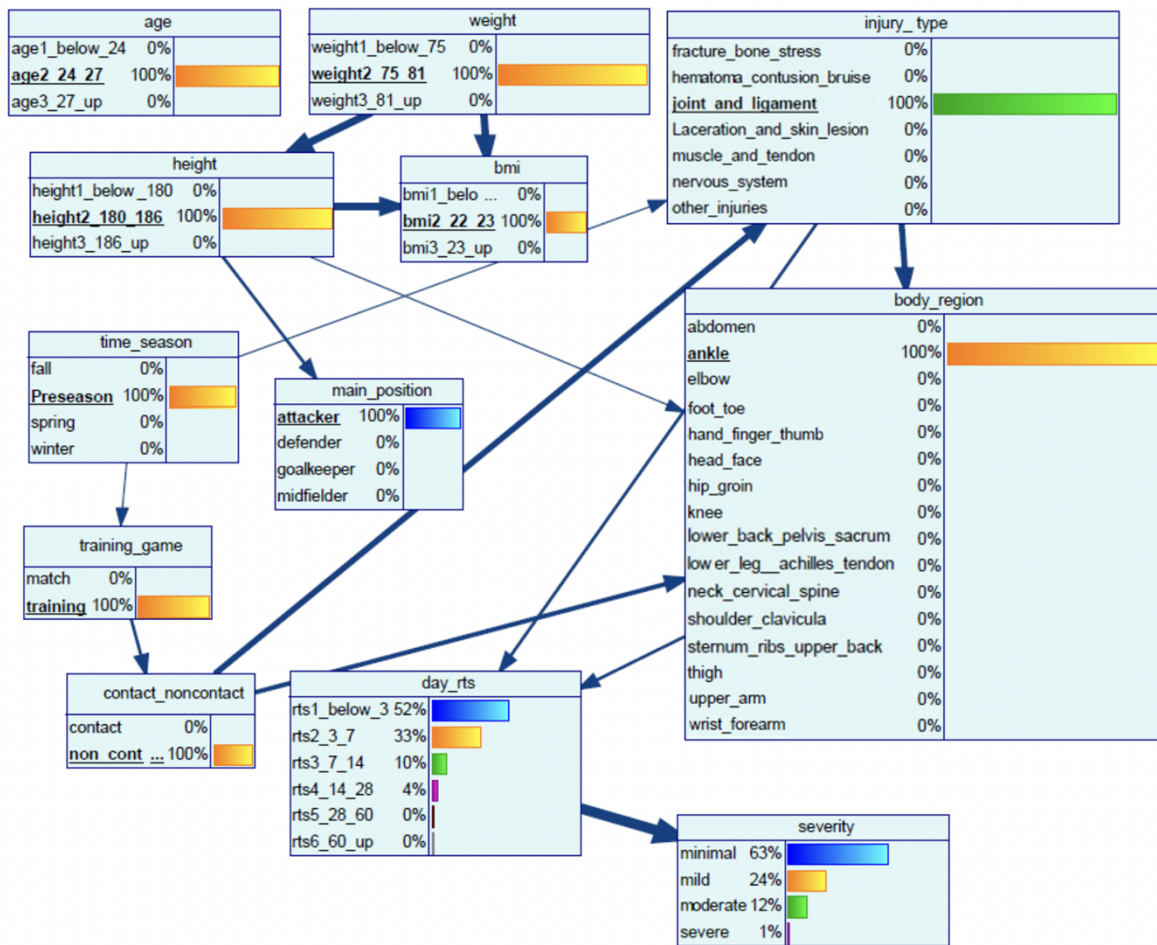

434

435 The BN indicates the joint multivariate probability distribution: the likelihood of the  
 436 injury to be minimal is 63%, mild 24%, moderate 12% and severe 1% (Figure 4). The  
 437 likelihood of RTS below 3 days is 52%, 3-7 days is 33%, 7-14 days is 10%, 14-28 days is 4%,  
 438 28-60 days and more than 60 days are less than 1%, respectively. This information, in  
 439 combination with clinical assessment, may be used to support coaches and players in predicting  
 440 days to RTS and support team planning by assessing the number of players available for  
 441 training and competition.

442 In Figure 4, the thickness of the arcs indicates the strength of influence. Medical staff  
 443 can use the strength of influence analysis to understand the local relationships among the  
 444 variables in a network and how they contribute to the posterior marginal probability (i.e.,  
 445 outcome) for each node in the network (Figure 4). The strength of influence calculates the  
 446 average effect of changing the state of a parent node on the probability distribution of states in  
 447 the child node(61). The arcs are normalised, thus the thickest arc indicates the one with the  
 448 highest influence. From Figure 4, the nature of the injury (contact or non-contact) is related to

449 the injury type and the body region. Injury type and body region are directly associated with  
450 the *days\_rts*. Medical staff may use *days\_rts* in conjunction with the clinical knowledge to  
451 project the rehabilitation timeline.

### 452 **4.3. Practical application and future developments**

453 The software we used for constructing the BN, GeNIe 2.0, could be used as a decision  
454 support tool by sports practitioners, including but not limited to coaches, team managers, sports  
455 science and medical staff. Once the BN has been constructed, for example, with the use of  
456 GeNIe 2.0, the end users do not need any machine-learning knowledge or advanced computer  
457 skills to use the BN. Instead, the only input from the sports practitioners is to collect and input  
458 the players' characteristics into the BN. The new data from every week or season can be input  
459 into the system's database by data scientists (either in-house or third party) to ensure the model  
460 is up-to-date. As technology continues to advance, the process of constructing and utilising BN  
461 is expected to become easier and more efficient. This increased ease of use may encourage  
462 medical staff to invest their efforts in learning and adopting BNs to support their decision-  
463 making processes.

464 When planning for RTS for an athlete, the BN can provide a personalised risk analysis  
465 from broad epidemiological data, as exemplified in section 4.2 "Illustrative application of the  
466 BN". While the results of the BN for estimating time to RTS align with existing clinical systems  
467 and therefore some practitioners may question the need for a computational decision support  
468 tool, it is important to see the potential benefits of integrating BN into sports medical practice  
469 in future. Conventional clinical guidelines often apply universally to all individuals regardless  
470 of age, sex, sport, or level of play. Consequently, they are not intended to offer an  
471 individualised approach to RTS estimation. Given that athletes' diverse needs and  
472 circumstances, coupled with the growing emphasis on personalised and precision medicine, a  
473 more tailored approach to estimating RTS becomes essential. In this regard, the incorporation  
474 of BN can serve as a valuable addition to sports medical practice to improve decision making.

475 In our previous example in section 4.2, we explained the use of BN with a return-to-  
476 sport (RTS) scenario and estimated the time to RTS based on a player's basic characteristics.  
477 However, it is important to note that this study is a pilot for future studies, and the potential  
478 applications of BN extend beyond this specific use case. They can be leveraged for various  
479 purposes, such as forecasting expected performance or injury risk in a game by considering

480 factors like personal characteristics, opponent playing style, and recent training and game  
481 performance. While in this study, the BN yield similar results to existing clinical systems, its  
482 true benefits lie in its ease of use, efficiency, and the capacity to incorporate a wider range of  
483 data into the decision-making process. Moreover, BN's ability to identify the strength of  
484 influence allows medical staff to address the variables that significantly impact outcomes, a  
485 task that cannot be adequately addressed by conventional clinical guidelines alone. By  
486 leveraging BN, medical staff may enhance their decision-making processes and provide more  
487 tailored and effective care to athletes.

488 Computational models are more likely to be implemented in applied sports settings if  
489 their accuracy, interpretability and functionality fit with the operation framework of a sports  
490 organisation(62). In this case, BN provides an intuitive visualisation of the complex  
491 relationship of injuries, which medical staff may understand even with little or no experience  
492 in computer analytics. This may increase the model's transparency and may improve the  
493 medical staff's trust in the model(63). In terms of practical applicability, medical staff can use  
494 the model to create scenarios that facilitate the evaluation of different management options or  
495 the development of rehabilitation protocols for players with various positions or injuries  
496 occurring at different times during the season. These scenarios enable the assessment of the  
497 combined effects of risk factors(27). This may enable them to proactively manage injury risk,  
498 and in case of injury, make more accurate predictions regarding the days to RTS for individual  
499 athletes based on epidemiological evidence. The BN can be modified to suit the specific context  
500 as determined by the user and updated with new information when available. In summary, BNs  
501 seem promising for modelling the relationships of variables in a complex system and may be  
502 further explored to support clinical decision making.

503 The epidemiological data we used in this study is static; thus, we use a BN to represent  
504 the system as a time-aggregated model. However, most systems, including athletes, have been  
505 well recognised to change over time(4, 64). To capture the change over time and the feedback  
506 loops, a BN can be further extended into a dynamic Bayesian network (DBN)(65). DBN is an  
507 extension of BNs and replicates the BN model at discrete points in time (time slices) and  
508 captures temporal relationships between the variables. DBNs can represent complex questions,  
509 such as how changes in rehabilitation training load affect the time to RTS in athletes with  
510 different demographic and anthropometric characteristics. Modifiable variables, such as  
511 rehabilitation training exposure, can be collected continuously over time as time-series  
512 data(66). Although DBN are more complex than BNs, DBNs have also been applied in medical

513 diagnosis or prognosis (67-69) and are a promising avenue for further investigation in an injury  
514 modelling context.

#### 515 **4.4. Limitations**

516 The proposed BN model has limitations that should be considered when interpreting its results.  
517 Firstly, it is important to recognise that the model was constructed using data solely from the  
518 Bundesliga, and therefore, the generalisability of the results to other leagues or levels of play  
519 is limited. Second, the quality of the input variables directly impacts the model's predictive  
520 accuracy. In the case of our BN, it was constructed using basic epidemiological data sourced  
521 from public databases. While this approach maximises the availability of injury events for the  
522 model, it lacks pertinent information related to prognosis, such as diagnosis (e.g., structural  
523 damage or functional disorder) and the precise location of the injury (e.g., involvement of  
524 central tendon in hamstring injury)(70). An accurate diagnosis of an injury plays a vital role in  
525 determining prognosis(11, 71). For instance, the recovery time to RTS can vary significantly  
526 between a minor partial tear in the hamstring muscle (requiring 17 days to RTS) and a moderate  
527 partial tear (requiring a longer time of 36 days to RTS). Therefore, the lack of detailed  
528 diagnostic information can impact the model's graphical structure and prediction accuracy.

529 Further studies may consider including more information into the model, such as quality  
530 and duration of rehabilitation training, RTS performance, reinjury incidence, the importance of  
531 upcoming competition, the remaining contract length, the club's geographical regions and the  
532 players' transfer value. Potentially, depending on the purpose of the model, we can integrate  
533 epidemiological data from other larger datasets into the model to enlarge the database to reduce  
534 the chance of overfitting and improve result transportability.

535 Comparing the machine-learned BN with the existing scientific understanding of injury  
536 and recovery would also be a valuable future avenue of research. This comparison can provide  
537 insights into the performance and predictive capabilities of a complex model that incorporates  
538 a wide range of variables in contrast to a simpler model, such as an epidemiological one. By  
539 doing so, researchers can evaluate the added value of BN as a decision-support tool.



## 540 **5. Conclusion**

541 This discrete BN provides a decision support tool to help medical staff, coaches and players  
542 manage injury. The BN has a high producer accuracy, ranging from 0.73 to 1.00 in predicting  
543 severity and provides a graphical representation of the investigated interdependencies. Medical  
544 staff can use BN to understand the strength of influence of different variables on the outcome  
545 and analyse the outcome based on custom RTS scenarios. This information may help medical  
546 staff evaluate different injury scenarios and better respond to individual player's rehabilitation  
547 and team planning. BNs seem promising for modelling the relationships of variables from  
548 multiple sources and can be further explored to support clinical decision making.

549

## 550 **Acknowledgement**

551 Our Bayesian network was built using GeNIe Modeler (BayesFusion 2019), available free of  
552 charge for academic research and teaching use from <https://www.bayesfusion.com/>. The  
553 authors would also like to thank Tobias Tröb and Abed Hadji for the data collection and injury  
554 database management.

## 555 **Ethics approval and consent to participate**

556 As the study data stems from publicly available media data, no ethical approval was needed. A  
557 consent to participate was not necessary as the study does not contain any person's individual  
558 data.

## 559 **Consent for Publication**

560 Not applicable as the study does not use any persons' individual data.

## 561 **Conflicts of interest/ Competing interests**

562 KY, PW, KadF, AH and TM declare that they have no competing interests.

## 563 **Funding**

564 No funding was received for this research.

## 565 **Authors' contribution**

566 KY, PW and TM conceptualised and designed the study. KadF led the data collection, checked  
567 all data for medical plausibility, and refined parts of the database. KY analysed, constructed,  
568 and interpreted the Bayesian network with technical support from PW. AH, PW and TM  
569 supervised the study. All authors read and approved the final manuscript.

## 570 6. Reference

571

- 572 1. Waldén M, Mountjoy M, McCall A, Serner A, Massey A, Tol JL, et al. Football-  
573 specific extension of the IOC consensus statement: methods for recording and reporting of  
574 epidemiological data on injury and illness in sport 2020. *British Journal of Sports Medicine*.  
575 2023;57(21):1341-50.
- 576 2. Ardern CL, Glasgow P, Schneiders A, Witvrouw E, Clarsen B, Cools A, et al. 2016  
577 Consensus statement on return to sport from the First World Congress in Sports Physical  
578 Therapy, Bern. *British Journal of Sports Medicine*. 2016;50(14):853-64.
- 579 3. Pol R, Balagué N, Ric A, Torrents C, Kiely J, Hristovski R. Training or Synergizing?  
580 Complex Systems Principles Change the Understanding of Sport Processes. *Sports Medicine*  
581 - Open. 2020;6(1):28.
- 582 4. Yung KK, Ardern CL, Serpiello FR, Robertson S. Characteristics of Complex  
583 Systems in Sports Injury Rehabilitation: Examples and Implications for Practice. *Sports*  
584 *Medicine - Open*. 2022;8(1):24.
- 585 5. Balague N, Torrents C, Hristovski R, Davids K, Araújo D. Overview of complex  
586 systems in sport. *Journal of Systems Science and Complexity*. 2013;26(1):4-13.
- 587 6. Hallen A, Ekstrand J. Return to play following muscle injuries in professional  
588 footballers. *Journal of Sports Sciences*. 2014;32(13):1229-36.
- 589 7. López-Valenciano A, Ruiz-Pérez I, Garcia-Gómez A, Vera-Garcia FJ, De Ste Croix  
590 M, Myer GD, et al. Epidemiology of injuries in professional football: a systematic review and  
591 meta-analysis. *British Journal of Sports Medicine*. 2020;54(12):711.
- 592 8. Lu D, McCall A, Jones M, Kovalchik S, Steinweg J, Gelis L, et al. Injury  
593 epidemiology in Australian male professional soccer. *Journal of Science and Medicine in*  
594 *Sport*. 2020;23(6):574-9.
- 595 9. aus der Fünten K, Tröb T, Hadji A, Beaudouin F, Steendahl IB, Meyer T.  
596 Epidemiology of Football Injuries of the German Bundesliga: A Media-Based, Prospective  
597 Analysis over 7 Consecutive Seasons. *Sports Medicine - Open*. 2023;9(1):20.
- 598 10. Hägglund M, Waldén M, Bahr R, Ekstrand J. Methods for epidemiological study of  
599 injuries to professional football players: developing the UEFA model. *British Journal of*  
600 *Sports Medicine*. 2005;39(6):340-6.
- 601 11. Ekstrand JK, Werner; Spreco, Armin; van Zoest, Wart; Roberts, Craig; Meyer, Tim;  
602 Bengtsson, Håkan. Time before return to play for the most common injuries in professional  
603 football: a 16-year follow-up of the UEFA Elite Club Injury Study. *British Journal of Sports*  
604 *Medicine*. 2019:bjsports-2019-100666.
- 605 12. Hecksteden A, Keller N, Zhang G, Meyer T, Hauser T. Why Humble Farmers May in  
606 Fact Grow Bigger Potatoes: A Call for Street-Smart Decision-Making in Sport. *Sports Med*  
607 *Open*. 2023;9(1):94.
- 608 13. Shrier I. Strategic Assessment of Risk and Risk Tolerance (StARRT) framework for  
609 return-to-play decision-making. *British Journal of Sports Medicine*. 2015;49(20):1311-5.
- 610 14. Miller GA. The magical number seven, plus or minus two: Some limits on our  
611 capacity for processing information. *Psychological review*. 1956;63(2):81-97.
- 612 15. Blumenthal-Barby JS, Krieger H. Cognitive Biases and Heuristics in Medical  
613 Decision Making:A Critical Review Using a Systematic Search Strategy. *Medical Decision*  
614 *Making*. 2015;35(4):539-57.
- 615 16. Yung KK, Ardern CL, Serpiello FR, Robertson S. A Framework for Clinicians to  
616 Improve the Decision-Making Process in Return to Sport. *Sports Medicine - Open*.  
617 2022;8(1):52.

- 618 17. Tversky A, Kahneman D. Judgment under Uncertainty: Heuristics and Biases.  
619 Science. 1974;185(4157):1124-31.
- 620 18. Kawamoto K, Houlihan CA, Balas EA, Lobach DF. Improving clinical practice using  
621 clinical decision support systems: a systematic review of trials to identify features critical to  
622 success. *BMJ*. 2005;330(7494):765.
- 623 19. Han J. Data mining concepts and techniques, third edition. 3rd ed ed. Kamber M, Pei  
624 J, editors. Waltham, Mass.: Morgan Kaufmann Publishers; 2012.
- 625 20. Heckerman D, Geiger D, Chickering DM. Learning Bayesian Networks: The  
626 Combination of Knowledge and Statistical Data. *Machine Learning*. 1995;20(3):197-243.
- 627 21. Binney ZO, Mansournia MA. Methods matter: (mostly) avoid categorising continuous  
628 data – a practical guide. *British Journal of Sports Medicine*. 2024;58(5):241-3.
- 629 22. Cartuyvels R, Spinks G, Moens M-F. Discrete and continuous representations and  
630 processing in deep learning: Looking forward. *AI Open*. 2021;2:143-59.
- 631 23. Wu PP-Y, Mengersen K, McMahon K, Kendrick GA, Chartrand K, York PH, et al.  
632 Timing anthropogenic stressors to mitigate their impact on marine ecosystem resilience.  
633 *Nature Communications*. 2017;8(1):1263.
- 634 24. Kim SK, Frisby CL. Gaining from discretization of continuous data: The  
635 correspondence analysis biplot approach. *Behav Res Methods*. 2019;51(2):589-601.
- 636 25. Fenton N, Neil M. Risk assessment and decision analysis with Bayesian networks. .  
637 Boca Raton: Chapman and Hall/CRC.; 2018.
- 638 26. Eugene C. Bayesian Networks without Tears. *AI Magazine*. 1991;12(4).
- 639 27. Fuster-Parra P, Tauler P, Bennasar-Veny M, Ligeza A, López-González AA, Aguiló  
640 A. Bayesian network modeling: A case study of an epidemiologic system analysis of  
641 cardiovascular risk. *Computer Methods and Programs in Biomedicine*. 2016;126:128-42.
- 642 28. Howard RA. The Foundations of Decision Analysis Revisited. In: von Winterfeldt D,  
643 Miles Jr RF, Edwards W, editors. *Advances in Decision Analysis: From Foundations to*  
644 *Applications*. Cambridge: Cambridge University Press; 2007. p. 32-56.
- 645 29. Heckerman DE, Nathwani BN. Toward normative expert systems: Part II.  
646 Probability-based representations for efficient knowledge acquisition and inference. *Methods*  
647 *of information in medicine*. 1992;31(2):106-16.
- 648 30. Constantinou A, Fenton N. Things to know about Bayesian networks. *Significance*.  
649 2018;15:19-23.
- 650 31. Hecksteden A, Kellner R, Donath L. Dealing with small samples in football research.  
651 *Science and Medicine in Football*. 2021:1-9.
- 652 32. Mengersen KL, Drovandi CC, Robert CP, Pyne DB, Gore CJ. Bayesian Estimation of  
653 Small Effects in Exercise and Sports Science. *PLOS ONE*. 2016;11(4):e0147311.
- 654 33. Hecksteden A, Forster S, Egger F, Buder F, Kellner R, Meyer T. Dwarfs on the  
655 Shoulders of Giants: Bayesian Analysis With Informative Priors in Elite Sports Research and  
656 Decision Making. *Frontiers in Sports and Active Living*. 2022;4.
- 657 34. Olmedilla A, Rubio VJ, Fuster-Parra P, Pujals C, García-Mas A. A Bayesian  
658 Approach to Sport Injuries Likelihood: Does Player's Self-Efficacy and Environmental  
659 Factors Plays the Main Role? *Frontiers in Psychology*. 2018;9(1174).
- 660 35. Dimitrova L, Petkova KG, editors. *Bayesian Network - Based Causal Analysis of*  
661 *Injury Risk in Elite Rhythmic Gymnastics*2014.
- 662 36. Lau CL, Mayfield HJ, Sinclair JE, Brown SJ, Waller M, Enjeti AK, et al. Risk-benefit  
663 analysis of the AstraZeneca COVID-19 vaccine in Australia using a Bayesian network  
664 modelling framework. *medRxiv*. 2021:2021.09.30.21264337.
- 665 37. El Khediri S, Thaljaoui A, Alfayez F. A Novel Decision-Making Process for COVID-  
666 19 Fighting Based on Association Rules and Bayesian Methods. *The Computer Journal*.  
667 2021.

- 668 38. Johnson S, Mengersen K, de Waal A, Marnewick K, Cilliers D, Houser AM, et al.  
669 Modelling cheetah relocation success in southern Africa using an Iterative Bayesian Network  
670 Development Cycle. *Ecological Modelling*. 2010;221(4):641-51.
- 671 39. Wu PP-Y, McMahon K, Rasheed MA, Kendrick GA, York PH, Chartrand K, et al.  
672 Managing seagrass resilience under cumulative dredging affecting light: Predicting risk using  
673 dynamic Bayesian networks. *Journal of Applied Ecology*. 2018;55(3):1339-50.
- 674 40. Wu PPY, Pitchforth J, Mengersen K. A Hybrid Queue-based Bayesian Network  
675 framework for passenger facilitation modelling. *Transportation Research Part C-Emerging  
676 Technologies*. 2014;46:247-60.
- 677 41. Beaudouin F, Demmerle D, Fuhr C, Tröb T, Meyer T. Head Impact Situations in  
678 Professional Football (Soccer). *Sports Med Int Open*. 2021;5(02):E37-E44.
- 679 42. Heus P, Damen JAAG, Pajouheshnia R, Scholten RJPM, Reitsma JB, Collins GS, et  
680 al. Uniformity in measuring adherence to reporting guidelines: the example of TRIPOD for  
681 assessing completeness of reporting of prediction model studies. *BMJ Open*.  
682 2019;9(4):e025611.
- 683 43. aus der Fünten K, Faude O, Lensch J, Meyer T. Injury Characteristics in the German  
684 Professional Male Soccer Leagues After a Shortened Winter Break. *Journal of Athletic  
685 Training*. 2014;49(6):786-93.
- 686 44. Fuller CW, Ekstrand J, Junge A, Andersen TE, Bahr R, Dvorak J, et al. Consensus  
687 statement on injury definitions and data collection procedures in studies of football (soccer)  
688 injuries. *British Journal of Sports Medicine*. 2006;40(3):193-201.
- 689 45. Druzdzel MJ, editor SMILE: Structural Modeling, Inference, and Learning Engine  
690 and GeNIe: a development environment for graphical decision-theoretic models. *Aaai/Iaai*;  
691 1999.
- 692 46. Ekstrand J, Hägglund M, Waldén M. Injury incidence and injury patterns in  
693 professional football: the UEFA injury study. *British Journal of Sports Medicine*.  
694 2011;45(7):553-8.
- 695 47. Hägglund M, Waldén M, Ekstrand J. Risk Factors for Lower Extremity Muscle Injury  
696 in Professional Soccer: The UEFA Injury Study. *The American Journal of Sports Medicine*.  
697 2013;41(2):327-35.
- 698 48. Cooper GF, Herskovits E. A Bayesian method for the induction of probabilistic  
699 networks from data. *Machine Learning*. 1992;9(4):309-47.
- 700 49. Beuzen T, Marshall L, Splinter KD. A comparison of methods for discretizing  
701 continuous variables in Bayesian Networks. *Environmental Modelling & Software*.  
702 2018;108:61-6.
- 703 50. Liu H, Hussain F, Tan CL, Dash M. Discretization: An Enabling Technique. *Data  
704 Mining and Knowledge Discovery*. 2002;6(4):393-423.
- 705 51. Dempster AP, Laird NM, Rubin DB. Maximum Likelihood from Incomplete Data via  
706 the EM Algorithm. *Journal of the Royal Statistical Society Series B (Methodological)*.  
707 1977;39(1):1-38.
- 708 52. Lauritzen SL. The EM algorithm for graphical association models with missing data.  
709 *Computational Statistics & Data Analysis*. 1995;19(2):191-201.
- 710 53. Hastie T, Tibshirani R, Friedman J. Model Assessment and Selection. *The Elements  
711 of Statistical Learning: Data Mining, Inference, and Prediction*. New York, NY: Springer  
712 New York; 2009. p. 219-59.
- 713 54. Congalton RG. A review of assessing the accuracy of classifications of remotely  
714 sensed data. *Remote Sensing of Environment*. 1991;37(1):35-46.
- 715 55. Woods C, Hawkins R, Hulse M, Hodson A. The Football Association Medical  
716 Research Programme: an audit of injuries in professional football—analysis of preseason  
717 injuries. *British Journal of Sports Medicine*. 2002;36(6):436-41.

- 718 56. Kjærulff U, Van Der Gaag LC, editors. Making sensitivity analysis computationally  
719 efficient. Conference on Uncertainty in Artificial Intelligence 2013; Stanford, CA.
- 720 57. Orchard J. Is there a relationship between ground and climatic conditions and injuries  
721 in football? *Sports medicine (Auckland, NZ)*. 2002;32(7):419-32.
- 722 58. Azubuike SO, Okojie OH. An epidemiological study of football (soccer) injuries in  
723 Benin City, Nigeria. *British Journal of Sports Medicine*. 2009;43(5):382-6.
- 724 59. Thomson A, Whiteley R, Bleakley C. Higher shoe-surface interaction is associated  
725 with doubling of lower extremity injury risk in football codes: a systematic review and meta-  
726 analysis. *British Journal of Sports Medicine*. 2015;49(19):1245-52.
- 727 60. Stanitski CL, McMaster JH, Ferguson RJ. Synthetic turf and grass: a comparative  
728 study. *The Journal of sports medicine*. 1974;2(1):22-6.
- 729 61. Koiter JR. Visualizing inference in Bayesian networks: Delft University of  
730 Technology; 2006.
- 731 62. Fernández J, editor *Decomposing the Immeasurable Sport: A deep learning expected*  
732 *possession value framework for soccer*. MIT Slogan Sports Analytics Conference; 2019;  
733 Boston, MA.
- 734 63. Bullock GS, Hughes T, Arundale AH, Ward P, Collins GS, Kluzek S. Black Box  
735 Prediction Methods in Sports Medicine Deserve a Red Card for Reckless Practice: A Change  
736 of Tactics is Needed to Advance Athlete Care. *Sports Medicine*. 2022.
- 737 64. Bittencourt NFN, Meeuwisse WH, Mendonça LD, Nettel-Aguirre A, Ocarino JM,  
738 Fonseca ST. Complex systems approach for sports injuries: moving from risk factor  
739 identification to injury pattern recognition—narrative review and new concept. *British*  
740 *Journal of Sports Medicine*. 2016;50(21):1309-14.
- 741 65. Murphy KP, Russell SJ, editors. *Dynamic bayesian networks: representation,*  
742 *inference and learning*2002.
- 743 66. Nielsen RØ, Malisoux L, Møller M, Theisen D, Parner ET. Shedding Light on the  
744 Etiology of Sports Injuries: A Look Behind the Scenes of Time-to-Event Analyses. *Journal of*  
745 *Orthopaedic & Sports Physical Therapy*. 2016;46(4):300-11.
- 746 67. Sandri M, Berchiolla P, Baldi I, Gregori D, De Blasi RA. Dynamic Bayesian  
747 Networks to predict sequences of organ failures in patients admitted to ICU. *Journal of*  
748 *Biomedical Informatics*. 2014;48:106-13.
- 749 68. van Gerven MAJ, Taal BG, Lucas PJF. Dynamic Bayesian networks as prognostic  
750 models for clinical patient management. *Journal of Biomedical Informatics*. 2008;41(4):515-  
751 29.
- 752 69. Galan SF, Aguado F, Diez F, Mira J. NasoNet, modeling the spread of  
753 nasopharyngeal cancer with networks of probabilistic events in discrete time. *Artificial*  
754 *Intelligence in Medicine*. 2002;25(3):247-64.
- 755 70. Mueller-Wohlfahrt H-W, Haensel L, Mithoefer K, Ekstrand J, English B, McNally S,  
756 et al. Terminology and classification of muscle injuries in sport: The Munich consensus  
757 statement. *British Journal of Sports Medicine*. 2013;47(6):342-50.
- 758 71. Ekstrand J, Askling C, Magnusson H, Mithoefer K. Return to play after thigh muscle  
759 injury in elite football players: implementation and validation of the Munich muscle injury  
760 classification. *British Journal of Sports Medicine*. 2013;47(12):769.
